# Supplementary material
Source: PubMed Central journal article supplement (PMC33398)
Supplement: 1471-2121-2-10-S2.pdf [file 1471-2121-2-10-S2.pdf]

Table 2

Comparison of the effects of different methods of preparation on the fluorescence intensity (Flu. int.), pattern of fluorescent labeling of stress fiber (SF) and morphological preservation of microextensions (ME) by TRITC-phalloidin (phalloidin) and monoclonal anti- $\alpha$ -actin antibody (mAb- $\alpha$ -actin) and pattern of tubulin staining by  $\beta$ -tubulin antibody (mAb- $\beta$ -tubulin). Morphological preservation of the cells attached on coverslips (Morph.) and of microextensions (ME) were also examined by SEM before and after treatment for fluorescence microscopy. The range is from excellent (+++++) to very poor (0).

| Method                           | Phalloidin                   |       |       | mAb- $\alpha$ -actin |       |       | mAb- $\beta$ -tubulin |         | SEM(before) |       | SEM(after) |       |
|----------------------------------|------------------------------|-------|-------|----------------------|-------|-------|-----------------------|---------|-------------|-------|------------|-------|
|                                  | Flu. int.                    | SF    | ME    | Flu. int.            | SF    | ME    | Flu. int.             | pattern | Morph.      | ME    | Morph.     | ME    |
| MeOH                             | +                            | +     | +     | +++++                | +++   | +++   | +++                   | ++      | +++++       | +++++ | +++++      | +++   |
| EtOH                             | +++                          | +++   | ++    | +                    | 0     | 0     | +++                   | ++++    | +++++       | +++++ | +++++      | ++++  |
| Acetone                          | +++++                        | +++++ | +++   | +++++                | +++++ | +++++ | +++++                 | +++++   | +++++       | +++++ | +++++      | +++++ |
| 5% or 10% TCA                    | +                            | 0     | 0     | +++++                | +++++ | +++++ | +++                   | +++     | +++++       | +++++ | +++++      | +++++ |
| 5%Sulfosalicylic acid            | +                            | 0     | 0     | +                    | 0     | 0     | ++                    | 0       | +++++       | +++++ | +++++      | +++++ |
| Carnoy                           | +                            | 0     | 0     | ++                   | +     | +     | +++                   | +       | +++++       | ++++  | +++++      | +++   |
| Bouin                            | +                            | 0     | 0     | ++                   | +     | +     | +++++                 | ++++    | +++++       | +++++ | +++++      | ++++  |
| Fixative                         | Extractor                    |       |       |                      |       |       |                       |         |             |       |            |       |
| 3.5% FA/PBS                      | acetone                      | +++++ | +++++ | +++                  | ++    | +     | ++++                  | ++++    | +++++       | +++++ | +++++      | ++++  |
| 3.7% FA/PBS                      | 0.1% Triton X-100/PBS        | +++++ | +++   | +                    | 0     | 0     | 0                     | 0       | ++          | +     | ++         | +     |
| 3.7% FA/PBS                      | 0.2% Triton X-100/PBS        | +++++ | +++++ | +++                  | 0     | 0     | 0                     | 0       | +++         | +++   | +++        | +++   |
| 3.7% FA/PBS                      | 0.5% Triton X-100/PBS        | +++++ | +++   | +                    | 0     | 0     | 0                     | 0       | ++          | +     | ++         | +     |
| 3.7% FA/PBS                      | 1% Triton X-100/PBS          | +++++ | +++   | +                    | 0     | 0     | 0                     | 0       | ++          | +     | ++         | +     |
| 3.7% FA/PBS(+)                   | 0.2% Triton X-100/PBS        | +++++ | +++++ | +++                  | 0     | 0     | 0                     | 0       | ++          | +     | +++++      | +++   |
| 4% PFA/PBS                       | -                            | +++++ | +++++ | +++                  | 0     | 0     | 0                     | 0       | 0           | 0     | ++         | +++   |
| 4% PFA+1%GA/PBS                  | 0.2% TX100/PBS               | +++++ | +++++ | +++++                | +     | 0     | 0                     | 0       | +++         | +++   | +++++      | +++++ |
| 4% PFA/PBS(+)                    | 0.1% TX100/PBS               | +++++ | +++++ | +++                  | +     | 0     | 0                     | 0       | +++         | +++   | +++        | ++    |
| 4% PFA/PBS                       | 0.2% TX100/PBS               | +++++ | +++++ | ++                   | +     | 0     | 0                     | 0       | +++         | ++    | ++         | ++    |
| 4% PFA/HBSS                      | acetone                      | ++++  | ++++  | +++                  | 0     | 0     | 0                     | 0       | ++++        | ++++  | +++        | +++   |
| 4% PFA/PBS                       | 0.2% TX100+3.6%PFA/PBS, acel | +++   | ++    | +                    | +++++ | +++   | +++                   | +++     | ++++        | ++++  | +++++      | +++++ |
| 4% PFA+0.05% GA/PB               | -                            | +++++ | ++++  | +++                  | 0     | 0     | 0                     | 0       | +++         | ++    | ++         | +++   |
| PLP                              | 1% saponin+3% BSA/PBS        | +++++ | ++++  | ++                   | 0     | 0     | 0                     | 0       | ++          | ++    | ++++       | +++   |
| LP                               | 1% saponin+3% BSA/PBS        | ++++  | ++++  | ++                   | 0     | 0     | 0                     | 0       | ++          | ++    | ++++       | +++   |
| -                                | 0.2% TX100/MTSB+2.5mM GTP    | +++++ | +++++ | +++++                | 0     | 0     | 0                     | 0       | ++++        | ++++  | +++++      | +++++ |
| (3%FA+0.05%GA+0.05%TX100/MTPB)   |                              | +++++ | ++++  | +++                  | 0     | 0     | 0                     | 0       | +++++       | +++++ | +++++      | +++++ |
| (3.7% Form/PEM/0.2% TX100), MeOH |                              | 0     | 0     | 0                    | +++++ | +++++ | +++++                 | +++++   | +++++       | +++++ | +++++      | +++++ |
| DSP/HBSS                         | DSP/Tsb                      | ++++  | +++++ | ++++                 | +     | 0     | 0                     | 0       | ++++        | +++++ | +++++      | +++++ |
| 4% PFA/PBS                       | 0.1% saponin+5% serum/PBS    | ++++  | +++   | +++                  | 0     | 0     | 0                     | 0       | ++++        | ++    | +++++      | ++++  |
| 4% PFA/PBS                       | 0.5% NP-40/PBS               | ++++  | ++++  | ++++                 | 0     | 0     | 0                     | 0       | +++         | +++   | ++++       | ++++  |
| 4% PFA+sucrose/CB                | 0.5% TX100/CB                | ++++  | ++++  | ++++                 | 0     | 0     | 0                     | 0       | +++         | ++++  | +++        | +++   |
| (MeOH, 3.7% FA, acetone)         |                              | 0     | 0     | 0                    | +++++ | +++   | ++++                  | +++     | ++++        | +++++ | +++++      | ++++  |
| (0.5% DOTMAC+1% PFA/PBS(+))      |                              | +++   | +++   | +++                  | ++++  | ++++  | +++++                 | ++      | ++          | +++++ | +++++      | +++++ |
